# Supplementary material for: Can Probiotics Improve the Environmental Microbiome and Resistome of Commercial Poultry Production?
Source: Int J Environ Res Public Health. 2013 Sep 25;10(10):4534–59. doi: 10.3390/ijerph10104534 (PMC3823317; doi:10.3390/ijerph10104534)
Supplement: Supplementary File 1 — Support Information 1 (PDF, 2526 KB) [file ijerph-10-04534-s001.pdf]

# Can Probiotics Improve the Environmental Microbiome and Resistome of Commercial Poultry Production?

Abundance of T-RFLP peaks contributing greater than 2% of total 16S rRNA signal of litter from 5 sequential flocks of broiler chickens reared on commercial poultry farms. Two houses (C and D) on each farm contained birds that were fed antibiotic growth promoters (AGP); houses A and B were fed no antibiotics. Red → green gradient in the columns shows the proportion of total sample signal represented by each fragment.

| Sorted by each fragment. |         |         |         |         |         |         |         |         |         |         |         |         |         |         |         |         |         |         |         |         | 0            | 0.05 | 0.1 | 0.15 | 0.2 | 0.25    | 0.3 | 0.35 | 0.4 | 0.45 | 0.5 |
|--------------------------|---------|---------|---------|---------|---------|---------|---------|---------|---------|---------|---------|---------|---------|---------|---------|---------|---------|---------|---------|---------|--------------|------|-----|------|-----|---------|-----|------|-----|------|-----|
| T-RFLP Size<br>(bp)      | HOUSE A |         |         |         |         | FARM 1  |         |         |         |         | HOUSE B |         |         |         |         | HOUSE C |         |         |         |         | FARM 1 - AGP |      |     |      |     | HOUSE D |     |      |     |      |     |
|                          | FLOCK 1 | FLOCK 2 | FLOCK 3 | FLOCK 4 | FLOCK 5 | FLOCK 1 | FLOCK 2 | FLOCK 3 | FLOCK 4 | FLOCK 5 | FLOCK 1 | FLOCK 2 | FLOCK 3 | FLOCK 4 | FLOCK 5 | FLOCK 1 | FLOCK 2 | FLOCK 3 | FLOCK 4 | FLOCK 5 |              |      |     |      |     |         |     |      |     |      |     |
| 63                       | 0.05    | 0.06    | 0.07    | 0.06    | 0.07    | 0.06    | 0.04    | 0.06    | 0.00    | 0.32    | 0.06    | 0.04    | 0.07    | 0.07    | 0.10    | 0.04    | 0.06    | 0.08    | 0.05    | 0.05    |              |      |     |      |     |         |     |      |     |      |     |
| 64                       | 0.00    | 0.00    | 0.00    | 0.00    | 0.00    | 0.00    | 0.00    | 0.00    | 0.00    | 0.00    | 0.00    | 0.00    | 0.00    | 0.00    | 0.00    | 0.00    | 0.00    | 0.00    | 0.00    | 0.00    |              |      |     |      |     |         |     |      |     |      |     |
| 65                       | 0.00    | 0.00    | 0.00    | 0.00    | 0.00    | 0.02    | 0.00    | 0.00    | 0.00    | 0.00    | 0.00    | 0.00    | 0.00    | 0.00    | 0.00    | 0.01    | 0.00    | 0.00    | 0.00    | 0.00    |              |      |     |      |     |         |     |      |     |      |     |
| 68                       | 0.00    | 0.00    | 0.00    | 0.00    | 0.00    | 0.00    | 0.00    | 0.00    | 0.00    | 0.00    | 0.00    | 0.00    | 0.00    | 0.00    | 0.00    | 0.00    | 0.00    | 0.00    | 0.00    | 0.00    |              |      |     |      |     |         |     |      |     |      |     |
| 69                       | 0.00    | 0.00    | 0.00    | 0.00    | 0.00    | 0.00    | 0.00    | 0.00    | 0.00    | 0.00    | 0.00    | 0.00    | 0.00    | 0.00    | 0.06    | 0.00    | 0.00    | 0.00    | 0.00    | 0.00    |              |      |     |      |     |         |     |      |     |      |     |
| 71                       | 0.00    | 0.01    | 0.00    | 0.00    | 0.00    | 0.00    | 0.00    | 0.00    | 0.00    | 0.00    | 0.02    | 0.04    | 0.02    | 0.00    | 0.00    | 0.04    | 0.00    | 0.00    | 0.00    | 0.00    |              |      |     |      |     |         |     |      |     |      |     |
| 77                       | 0.00    | 0.02    | 0.03    | 0.00    | 0.00    | 0.02    | 0.00    | 0.00    | 0.00    | 0.00    | 0.02    | 0.03    | 0.03    | 0.00    | 0.00    | 0.03    | 0.00    | 0.00    | 0.00    | 0.00    |              |      |     |      |     |         |     |      |     |      |     |
| 78                       | 0.07    | 0.06    | 0.07    | 0.10    | 0.07    | 0.05    | 0.08    | 0.14    | 0.17    | 0.00    | 0.04    | 0.05    | 0.07    | 0.12    | 0.11    | 0.04    | 0.09    | 0.08    | 0.10    | 0.10    |              |      |     |      |     |         |     |      |     |      |     |
| 81                       | 0.00    | 0.00    | 0.00    | 0.00    | 0.00    | 0.00    | 0.00    | 0.00    | 0.00    | 0.00    | 0.00    | 0.01    | 0.00    | 0.00    | 0.00    | 0.01    | 0.00    | 0.00    | 0.00    | 0.00    |              |      |     |      |     |         |     |      |     |      |     |
| 178                      | 0.02    | 0.05    | 0.07    | 0.08    | 0.07    | 0.04    | 0.07    | 0.05    | 0.04    | 0.00    | 0.06    | 0.04    | 0.07    | 0.05    | 0.10    | 0.04    | 0.09    | 0.09    | 0.06    | 0.06    |              |      |     |      |     |         |     |      |     |      |     |
| 181                      | 0.02    | 0.05    | 0.06    | 0.07    | 0.09    | 0.04    | 0.00    | 0.06    | 0.05    | 0.00    | 0.05    | 0.00    | 0.07    | 0.06    | 0.00    | 0.04    | 0.02    | 0.06    | 0.04    | 0.04    |              |      |     |      |     |         |     |      |     |      |     |
| 182                      | 0.00    | 0.00    | 0.00    | 0.00    | 0.00    | 0.00    | 0.00    | 0.00    | 0.00    | 0.00    | 0.00    | 0.05    | 0.00    | 0.00    | 0.09    | 0.00    | 0.00    | 0.00    | 0.00    | 0.00    |              |      |     |      |     |         |     |      |     |      |     |
| 199                      | 0.00    | 0.00    | 0.00    | 0.00    | 0.00    | 0.00    | 0.00    | 0.00    | 0.00    | 0.00    | 0.00    | 0.00    | 0.00    | 0.00    | 0.00    | 0.00    | 0.00    | 0.00    | 0.00    | 0.00    |              |      |     |      |     |         |     |      |     |      |     |
| 201                      | 0.00    | 0.02    | 0.02    | 0.02    | 0.02    | 0.00    | 0.00    | 0.00    | 0.00    | 0.00    | 0.00    | 0.04    | 0.02    | 0.00    | 0.00    | 0.00    | 0.00    | 0.00    | 0.00    | 0.00    |              |      |     |      |     |         |     |      |     |      |     |
| 205                      | 0.00    | 0.00    | 0.00    | 0.00    | 0.00    | 0.00    | 0.00    | 0.00    | 0.00    | 0.00    | 0.00    | 0.00    | 0.00    | 0.00    | 0.00    | 0.01    | 0.00    | 0.00    | 0.00    | 0.00    |              |      |     |      |     |         |     |      |     |      |     |
| 206                      | 0.00    | 0.00    | 0.00    | 0.00    | 0.00    | 0.00    | 0.00    | 0.00    | 0.00    | 0.00    | 0.00    | 0.01    | 0.00    | 0.00    | 0.00    | 0.00    | 0.00    | 0.00    | 0.00    | 0.00    |              |      |     |      |     |         |     |      |     |      |     |
| 208                      | 0.00    | 0.00    | 0.00    | 0.00    | 0.00    | 0.00    | 0.00    | 0.00    | 0.00    | 0.00    | 0.00    | 0.01    | 0.00    | 0.00    | 0.00    | 0.00    | 0.00    | 0.00    | 0.00    | 0.00    |              |      |     |      |     |         |     |      |     |      |     |
| 210                      | 0.00    | 0.01    | 0.01    | 0.00    | 0.00    | 0.01    | 0.00    | 0.00    | 0.00    | 0.00    | 0.01    | 0.02    | 0.00    | 0.00    | 0.00    | 0.02    | 0.00    | 0.00    | 0.00    | 0.00    |              |      |     |      |     |         |     |      |     |      |     |
| 212                      | 0.00    | 0.01    | 0.02    | 0.00    | 0.00    | 0.01    | 0.00    | 0.00    | 0.00    | 0.00    | 0.01    | 0.03    | 0.01    | 0.00    | 0.00    | 0.03    | 0.00    | 0.00    | 0.00    | 0.00    |              |      |     |      |     |         |     |      |     |      |     |
| 215                      | 0.00    | 0.00    | 0.00    | 0.00    | 0.00    | 0.00    | 0.00    | 0.00    | 0.00    | 0.00    | 0.00    | 0.00    | 0.00    | 0.00    | 0.00    | 0.01    | 0.00    | 0.00    | 0.00    | 0.00    |              |      |     |      |     |         |     |      |     |      |     |
| 217                      | 0.00    | 0.00    | 0.00    | 0.00    | 0.00    | 0.00    | 0.00    | 0.00    | 0.00    | 0.00    | 0.00    | 0.00    | 0.00    | 0.00    | 0.00    | 0.01    | 0.00    | 0.00    | 0.00    | 0.00    |              |      |     |      |     |         |     |      |     |      |     |
| 219                      | 0.00    | 0.00    | 0.00    | 0.00    | 0.00    | 0.00    | 0.00    | 0.00    | 0.00    | 0.00    | 0.00    | 0.01    | 0.00    | 0.00    | 0.00    | 0.00    | 0.00    | 0.00    | 0.00    | 0.00    |              |      |     |      |     |         |     |      |     |      |     |
| 221                      | 0.00    | 0.00    | 0.00    | 0.00    | 0.00    | 0.00    | 0.00    | 0.00    | 0.00    | 0.11    | 0.00    | 0.01    | 0.00    | 0.00    | 0.00    | 0.00    | 0.00    | 0.00    | 0.00    | 0.00    |              |      |     |      |     |         |     |      |     |      |     |
| 222                      | 0.00    | 0.00    | 0.00    | 0.00    | 0.00    | 0.00    | 0.00    | 0.00    | 0.00    | 0.00    | 0.00    | 0.00    | 0.00    | 0.00    | 0.00    | 0.01    | 0.00    | 0.00    | 0.00    | 0.00    |              |      |     |      |     |         |     |      |     |      |     |
| 224                      | 0.00    | 0.00    | 0.01    | 0.00    | 0.01    | 0.05    | 0.00    | 0.00    | 0.00    | 0.00    | 0.00    | 0.00    | 0.00    | 0.00    | 0.00    | 0.00    | 0.00    | 0.00    | 0.00    | 0.00    |              |      |     |      |     |         |     |      |     |      |     |
| 225                      | 0.00    | 0.00    | 0.00    | 0.00    | 0.00    | 0.00    | 0.00    | 0.00    | 0.00    | 0.00    | 0.00    | 0.01    | 0.00    | 0.00    | 0.03    | 0.02    | 0.00    | 0.00    | 0.00    | 0.00    |              |      |     |      |     |         |     |      |     |      |     |
| 226                      | 0.00    | 0.00    | 0.00    | 0.00    | 0.00    | 0.00    | 0.00    | 0.00    | 0.00    | 0.00    | 0.00    | 0.00    | 0.00    | 0.00    | 0.00    | 0.00    | 0.00    | 0.00    | 0.00    | 0.00    |              |      |     |      |     |         |     |      |     |      |     |
| 227                      | 0.00    | 0.00    | 0.00    | 0.00    | 0.00    | 0.00    | 0.00    | 0.00    | 0.00    | 0.00    | 0.00    | 0.00    | 0.00    | 0.00    | 0.00    | 0.00    | 0.00    | 0.00    | 0.00    | 0.00    |              |      |     |      |     |         |     |      |     |      |     |
| 228                      | 0.00    | 0.00    | 0.00    | 0.00    | 0.00    | 0.00    | 0.00    | 0.00    | 0.00    | 0.00    | 0.00    | 0.00    | 0.00    | 0.00    | 0.00    | 0.00    | 0.00    | 0.00    | 0.00    | 0.00    |              |      |     |      |     |         |     |      |     |      |     |
| 229                      | 0.00    | 0.00    | 0.00    | 0.00    | 0.00    | 0.00    | 0.00    | 0.00    | 0.00    | 0.00    | 0.00    | 0.00    | 0.00    | 0.00    | 0.00    | 0.00    | 0.00    | 0.00    | 0.00    | 0.00    |              |      |     |      |     |         |     |      |     |      |     |
| 230                      | 0.00    | 0.00    | 0.00    | 0.00    | 0.00    | 0.00    | 0.00    | 0.09    | 0.20    | 0.00    | 0.00    | 0.00    | 0.00    | 0.16    | 0.00    | 0.00    | 0.00    | 0.00    | 0.12    | 0.12    |              |      |     |      |     |         |     |      |     |      |     |
| 231                      | 0.00    | 0.00    | 0.00    | 0.00    | 0.00    | 0.00    | 0.00    | 0.00    | 0.00    | 0.00    | 0.00    | 0.00    | 0.00    | 0.00    | 0.00    | 0.00    | 0.00    | 0.00    | 0.00    | 0.00    |              |      |     |      |     |         |     |      |     |      |     |
| 232                      | 0.00    | 0.00    | 0.00    | 0.00    | 0.00    | 0.00    | 0.00    | 0.00    | 0.00    | 0.28    | 0.00    | 0.00    | 0.00    | 0.00    | 0.00    | 0.00    | 0.00    | 0.00    | 0.00    | 0.00    |              |      |     |      |     |         |     |      |     |      |     |
| 233                      | 0.08    | 0.06    | 0.07    | 0.09    | 0.10    | 0.06    | 0.08    | 0.15    | 0.22    | 0.00    | 0.06    | 0.00    | 0.08    | 0.16    | 0.00    | 0.00    | 0.10    | 0.10    | 0.10    | 0.12    |              |      |     |      |     |         |     |      |     |      |     |
| 234                      | 0.00    | 0.00    | 0.00    | 0.06    | 0.06    | 0.00    | 0.03    | 0.00    | 0.00    | 0.13    | 0.00    | 0.05    | 0.07    | 0.00    | 0.10    | 0.00    | 0.00    | 0.00    | 0.00    | 0.00    |              |      |     |      |     |         |     |      |     |      |     |
| 235                      | 0.00    | 0.00    | 0.00    | 0.00    | 0.00    | 0.00    | 0.00    | 0.00    | 0.00    | 0.00    | 0.00    | 0.00    | 0.00    | 0.00    | 0.00    | 0.04    | 0.00    | 0.00    | 0.00    | 0.00    |              |      |     |      |     |         |     |      |     |      |     |
| 236                      | 0.00    | 0.00    | 0.02    | 0.00    | 0.03    | 0.00    | 0.00    | 0.00    | 0.00    | 0.00    | 0.02    | 0.03    | 0.00    | 0.00    | 0.00    | 0.00    | 0.00    | 0.02    | 0.00    | 0.00    |              |      |     |      |     |         |     |      |     |      |     |
| 237                      | 0.00    | 0.02    | 0.00    | 0.03    | 0.00    | 0.03    | 0.00    | 0.00    | 0.00    | 0.00    | 0.00    | 0.00    | 0.03    | 0.00    | 0.05    | 0.03    | 0.00    | 0.00    | 0.00    | 0.00    |              |      |     |      |     |         |     |      |     |      |     |
| 238                      | 0.01    | 0.00    | 0.00    | 0.00    | 0.00    | 0.00    | 0.00    | 0.00    | 0.00    | 0.00    | 0.00    | 0.00    | 0.00    | 0.00    | 0.00    | 0.00    | 0.00    | 0.00    | 0.00    | 0.00    |              |      |     |      |     |         |     |      |     |      |     |
| 241                      | 0.00    | 0.00    | 0.00    | 0.00    | 0.00    | 0.00    | 0.00    | 0.13    | 0.07    | 0.00    | 0.00    | 0.00    | 0.00    | 0.05    | 0.00    | 0.00    | 0.00    | 0.00    | 0.00    | 0.00    |              |      |     |      |     |         |     |      |     |      |     |
| 242                      | 0.08    | 0.00    | 0.05    | 0.08    | 0.09    | 0.06    | 0.10    | 0.00    | 0.00    | 0.16    | 0.05    | 0.04    | 0.07    | 0.00    | 0.05    | 0.04    | 0.00    | 0.10    | 0.12    | 0.12    |              |      |     |      |     |         |     |      |     |      |     |
| 243                      | 0.00    | 0.00    | 0.00    | 0.00    | 0.00    | 0.00    | 0.00    | 0.00    | 0.00    | 0.00    | 0.00    | 0.00    | 0.00    | 0.00    | 0.00    | 0.00    | 0.00    | 0.00    | 0.00    | 0.00    |              |      |     |      |     |         |     |      |     |      |     |
| 244                      | 0.00    | 0.04    | 0.06    | 0.02    | 0.00    | 0.00    | 0.00    | 0.03    | 0.00    | 0.00    | 0.03    | 0.03    | 0.00    | 0.00    | 0.00    | 0.04    | 0.00    | 0.03    | 0.00    | 0.00    |              |      |     |      |     |         |     |      |     |      |     |
| 245                      | 0.00    | 0.03    | 0.00    | 0.00    | 0.00    | 0.00    | 0.02    | 0.00    | 0.00    | 0.00    | 0.00    | 0.00    | 0.00    | 0.00    | 0.00    | 0.00    | 0.00    | 0.00    | 0.00    | 0.00    |              |      |     |      |     |         |     |      |     |      |     |
| 246                      | 0.02    | 0.00    | 0.00    | 0.02    | 0.02    | 0.04    | 0.05    | 0.04    | 0.00    | 0.00    | 0.03    | 0.03    | 0.04    | 0.00    | 0.00    | 0.00    | 0.04    | 0.04    | 0.00    | 0.00    |              |      |     |      |     |         |     |      |     |      |     |
| 247                      | 0.09    | 0.00    | 0.00    | 0.00    | 0.00    | 0.00    | 0.00    | 0.00    | 0.00    | 0.00    | 0.00    | 0.00    | 0.00    | 0.00    | 0.00    | 0.00    | 0.00    | 0.00    | 0.05    | 0.05    |              |      |     |      |     |         |     |      |     |      |     |
| 248                      | 0.00    | 0.07    | 0.05    | 0.03    | 0.06    | 0.03    | 0.00    | 0.00    | 0.00    | 0.00    | 0.05    | 0.05    | 0.03    | 0.03    | 0.04    | 0.04    | 0.07    | 0.03    | 0.00    | 0.00    |              |      |     |      |     |         |     |      |     |      |     |
| 249                      | 0.00    | 0.01    | 0.02    | 0.00    | 0.00    | 0.00    | 0.00    | 0.00    | 0.00    | 0.00    | 0.00    | 0.01    | 0.00    | 0.00    | 0.00    | 0.00    | 0.02    | 0.00    | 0.00    | 0.00    |              |      |     |      |     |         |     |      |     |      |     |
| 250                      | 0.00    | 0.00    | 0.00    | 0.00    | 0.00    | 0.00    | 0.00    | 0.00    | 0.00    | 0.00    | 0.02    | 0.00    | 0.00    | 0.00    | 0.00    | 0.02    | 0.00    | 0.00    | 0.00    | 0.00    |              |      |     |      |     |         |     |      |     |      |     |
| 251                      | 0.00    | 0.01    | 0.01    | 0.00    | 0.00    | 0.00    | 0.00    | 0.00    | 0.00    | 0.00    | 0.00    | 0.01    | 0.00    | 0.00    | 0.00    | 0.02    | 0.02    | 0.00    | 0.00    | 0.00    |              |      |     |      |     |         |     |      |     |      |     |
| 255                      | 0.00    | 0.00    | 0.00    | 0.00    | 0.00    | 0.00    | 0.00    | 0.00    | 0.00    | 0.00    | 0.00    | 0.00    | 0.00    | 0.00    | 0.00    | 0.01    | 0.00    | 0.00    | 0.00    | 0.00    |              |      |     |      |     |         |     |      |     |      |     |
| 261                      | 0.00    | 0.00    | 0.00    | 0.00    | 0.00    | 0.00    | 0.00    | 0.00    | 0.00    | 0.00    | 0.00    | 0.01    | 0.00    | 0.00    | 0.00    | 0.01    | 0.00    | 0.00    | 0.00    | 0.00    |              |      |     |      |     |         |     |      |     |      |     |
| 264                      | 0.02    | 0.00    | 0.00    | 0.00    | 0.00    | 0.00    | 0.05    | 0.00    | 0.00    | 0.00    | 0.00    | 0.00    | 0.00    | 0.00    | 0.00    | 0.00    | 0.04    | 0.00    | 0.00    | 0.00    |              |      |     |      |     |         |     |      |     |      |     |
| 265                      | 0.00    | 0.06    | 0.03    | 0.00    | 0.00    | 0.03    | 0.00    | 0.00    | 0.00    | 0.00    | 0.03    | 0.04    | 0.02    | 0.00    | 0.00    | 0.03    | 0.10    | 0.00    | 0.00    | 0.00    |              |      |     |      |     |         |     |      |     |      |     |
| 266                      | 0.09    | 0.06    | 0.      |         |         |         |         |         |         |         |         |         |         |         |         |         |         |         |         |         |              |      |     |      |     |         |     |      |     |      |     |

[illegible]
